# Supplementary material for: Soft X-ray absorption spectroscopy of Ar2 and ArNe dimers and small Ar clusters
Source: Royal Society of Chemistry journal article supplement (doi:10.1039/c5cp03276h), 2015-01-01
Supplement: c5cp03276h1.pdf [file c5cp03276h1.pdf]

Electronic Supplementary Information  
Soft X-ray absorption spectroscopy of Ar<sub>2</sub> and ArNe dimers and small Ar clusters.

June 9, 2015

Ghazal Jabbari,<sup>a</sup> Tsveta Miteva,<sup>a</sup> Kirill Gokhberg,<sup>a</sup> Patrick O’Keeffe,<sup>b</sup> Alessandra Ciavardini,<sup>b</sup> Paola Bolognesi,<sup>b</sup> Marcello Coreno,<sup>b</sup> Lorenzo Avaldi,<sup>b</sup> Elham Keshavarz,<sup>c</sup> Maryam Ghandehari,<sup>d</sup> Manijeh Tozihi,<sup>e</sup> Carlo Callegari,<sup>f</sup> Michele Alagia,<sup>h</sup> Kevin Charles Prince,<sup>f,g,h</sup> Antti Kivimäki,<sup>g</sup> and Robert Richter<sup>f</sup>

<sup>a</sup> Theoretische Chemie, Physikalisch-Chemisches Institut, Universität Heidelberg, Im Neuenheimer Feld 229, D-69120 Heidelberg, Germany <sup>b</sup> CNR-ISM, Area della Ricerca di Roma 1, Monterotondo Scalo, Italy. <sup>c</sup> Department of Chemistry, Isfahan University, Iran. <sup>d</sup> Department of Chemistry, Isfahan University of Technology, Iran. <sup>e</sup> Department of Chemistry, University of Zanjan, Zanjan 45371-38791, Iran. <sup>f</sup> Elettra-Sincrotrone Trieste, Basovizza I-34149, Italy. <sup>g</sup> Molecular Model Discovery Laboratory, Department of Chemistry and Biotechnology, Faculty of Sciences, Engineering and Technology, Swinburne University of Technology, Melbourne, Victoria 3122, Australia. <sup>h</sup> CNR-IOM, Area Science Park, 34149 Trieste, Italy.

The computational packages and techniques used to calculate the data shown here are based on those described in<sup>1-4</sup>

## References

- [1] J. Wenzel, M. Wormit and A. Dreuw, *Journal of Computational Chemistry*, 2014, **35**, 1900–1915.
- [2] J. Wenzel, M. Wormit and A. Dreuw, *Journal of Chemical Theory and Computation*, 2014, **10**, 4583–4598.
- [3] M. Wormit, D. R. Rehn, P. H. Harbach, J. Wenzel, C. M. Krauter, E. Epifanovsky and A. Dreuw, *Molecular Physics*, 2014, **112**, 774–784.
- [4] Y. Shao, Z. Gan, E. Epifanovsky, A. T. Gilbert, M. Wormit, J. Kussmann, A. W. Lange, A. Behn, J. Deng, X. Feng, D. Ghosh, M. Goldey, P. R. Horn, L. D. Jacobson, I. Kaliman, R. Z. Khaliullin, T. Kus, A. Landau, J. Liu, E. I. Proynov, Y. M. Rhee, R. M. Richard, M. A. Rohrdanz, R. P. Steele, E. J. Sundstrom, H. L. Woodcock, P. M. Zimmerman, D. Zuev, B. Albrecht, E. Alguire, B. Austin, G. J. O. Beran, Y. A. Bernard, E. Berquist, K. Brandhorst, K. B. Bravaya, S. T. Brown, D. Casanova, C.-M. Chang, Y. Chen, S. H. Chien, K. D. Closser, D. L. Crittenden, M. Diedenhofen, R. A. DiStasio, H. Do, A. D. Dutoi, R. G. Edgar, S. Fatehi, L. Fusti-Molnar, A. Ghysels, A. Golubeva-Zadorozhnaya, J. Gomes, M. W. Hanson-Heine, P. H. Harbach, A. W. Hauser, E. G. Hohenstein, Z. C. Holden, T.-C. Jagau, H. Ji, B. Kaduk, K. Khistyayev, J. Kim, J. Kim, R. A. King, P. Klunzinger, D. Kosenkov, T. Kowalczyk, C. M. Krauter, K. U. Lao, A. D. Laurent, K. V. Lawler, S. V. Levchenko, C. Y. Lin, F. Liu, E. Livshits, R. C. Lochan, A. Luenser, P. Manohar, S. F. Manzer, S.-P. Mao, N. Mardirossian, A. V. Marenich, S. A. Maurer, N. J. Mayhall, E. Neuscamman, C. M. Oana, R. Olivares-Amaya, D. P. O’Neill, J. A. Parkhill, T. M. Perrine, R. Peverati, A. Prociuk, D. R. Rehn, E. Rosta, N. J. Russ, S. M. Sharada, S. Sharma, D. W. Small, A. Sodt, T. Stein, D. Stück, Y.-C. Su, A. J. Thom, T. Tsuchimochi, V. Vanovschi, L. Vogt, O. Vydrov, T. Wang, M. A. Watson, J. Wenzel, A. White, C. F. Williams, J. Yang, S. Yeganeh, S. R. Yost, Z.-Q. You, I. Y. Zhang, X. Zhang, Y. Zhao, B. R. Brooks, G. K. Chan, D. M. Chipman, C. J. Cramer, W. A. Goddard, M. S. Gordon, W. J. Hehre, A. Klamt, H. F. Schaefer, M. W. Schmidt, C. D. Sherrill, D. G. Truhlar, A. Warshel, X. Xu, A. Aspuru-Guzik, R. Baer, A. T. Bell, N. A. Besley, J.-D. Chai, A. Dreuw, B. D. Dunietz, T. R. Furlani, S. R. Gwaltney, C.-P. Hsu, Y. Jung, J. Kong, D. S. Lambrecht, W. Liang, C. Ochsenfeld, V. A. Rassolov, L. V. Slipchenko, J. E. Subotnik, T. Van Voorhis, J. M. Herbert, A. I. Krylov, P. M. Gill and M. Head-Gordon, *Molecular Physics*, 2015, **113**, 184–215.

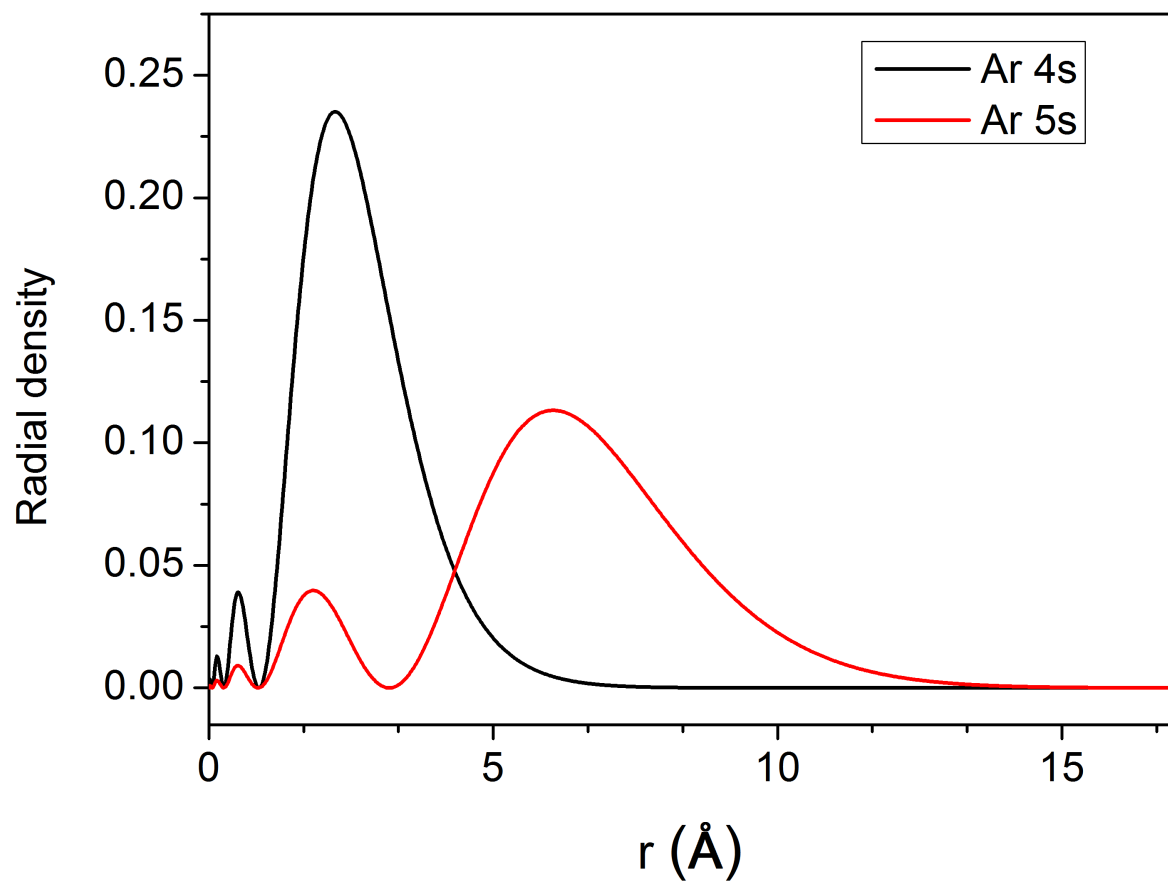

Figure S1: Radial densities of the natural atomic 4s and 5s orbitals of Ar.

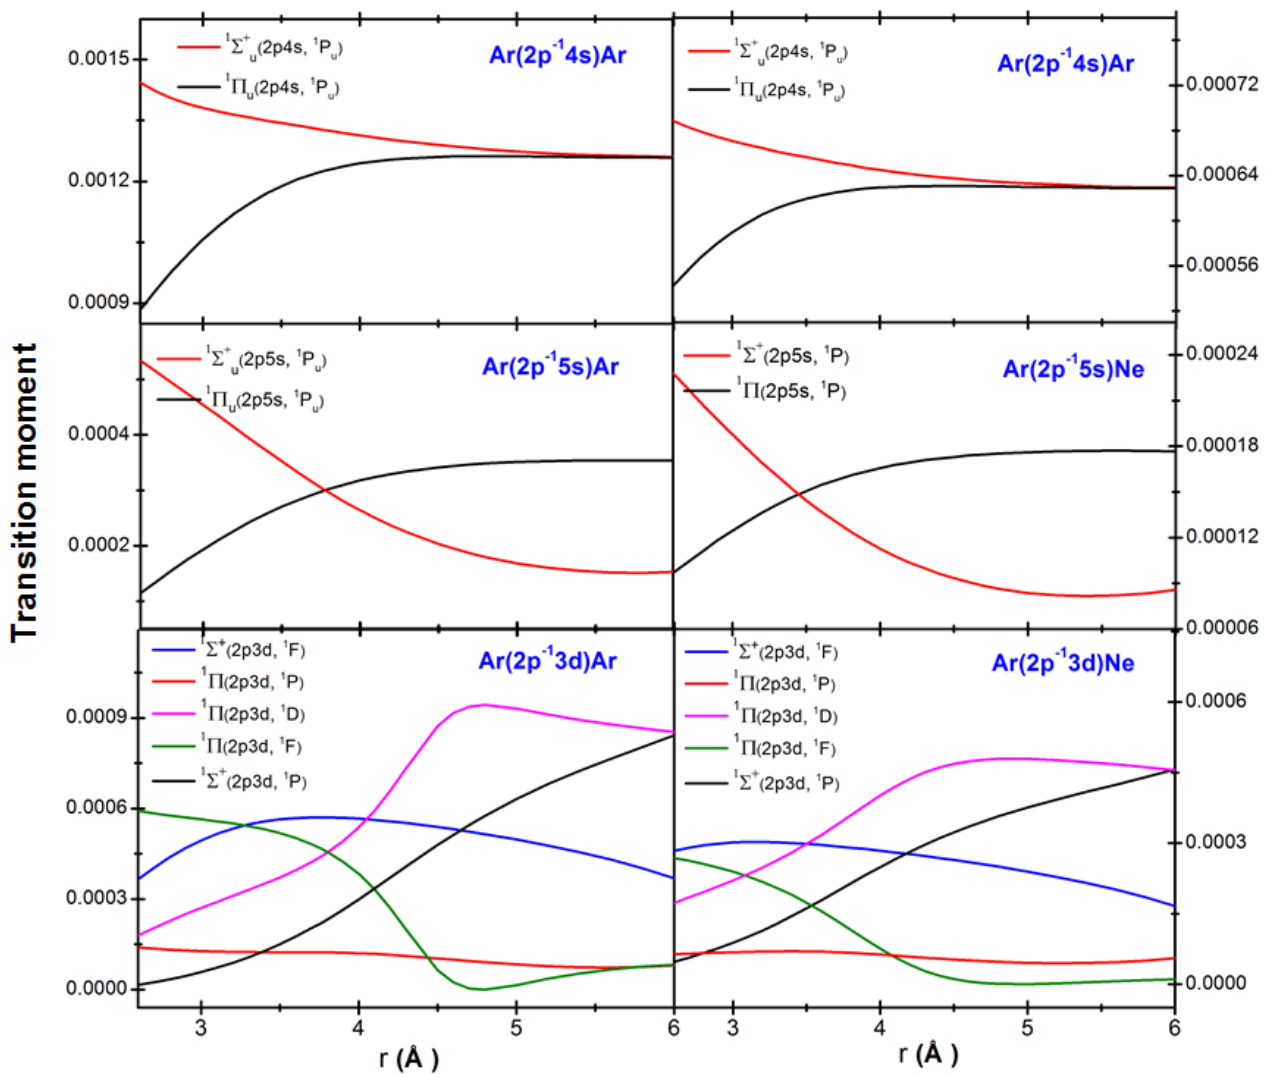

Figure S2: The transition moments as a function of the internuclear distance for transition from the ground state to the core excited states shown in Figure 5 of the main text.
